# Supplementary material for: Diabetes Impairs Stem Cell and Proangiogenic Cell Mobilization in Humans
Source: PubMed Central journal article supplement — Diabetes Care. 2013 Mar 14;36(4):943–9. doi: 10.2337/dc12-1084 (PMC3609511; doi:10.2337/dc12-1084), 2013-03-14

SUPPLEMENTARY DATA

**Supplementary Figure 1.** Pre- and post-G-CSF levels of white blood cells (WBC, A), neutrophils (B) and monocytes (C) count in DM and non DM patients. \*  $p < 0.05$  versus pre-GCSF. D) Absolute changes in WBC, neutrophils and monocytes: no significant differences were found between DM patients and non DM controls in the change in blood cell counts.

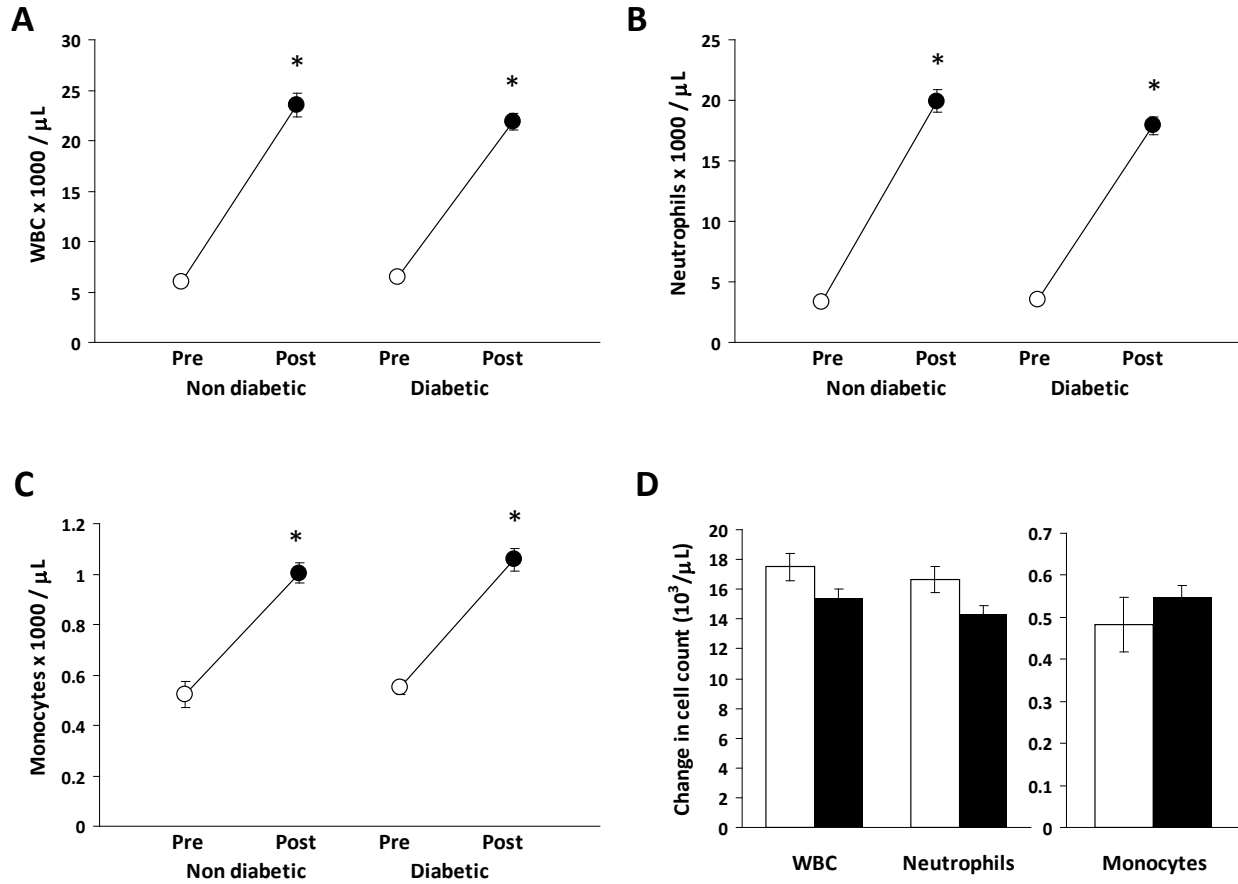

SUPPLEMENTARY DATA

**Supplementary Figure 2.** Significant linear correlations between Matrigel plug neovascularisation and progenitor cell levels. White circles indicate pre-GCSF; black circles indicate post-GCSF data.

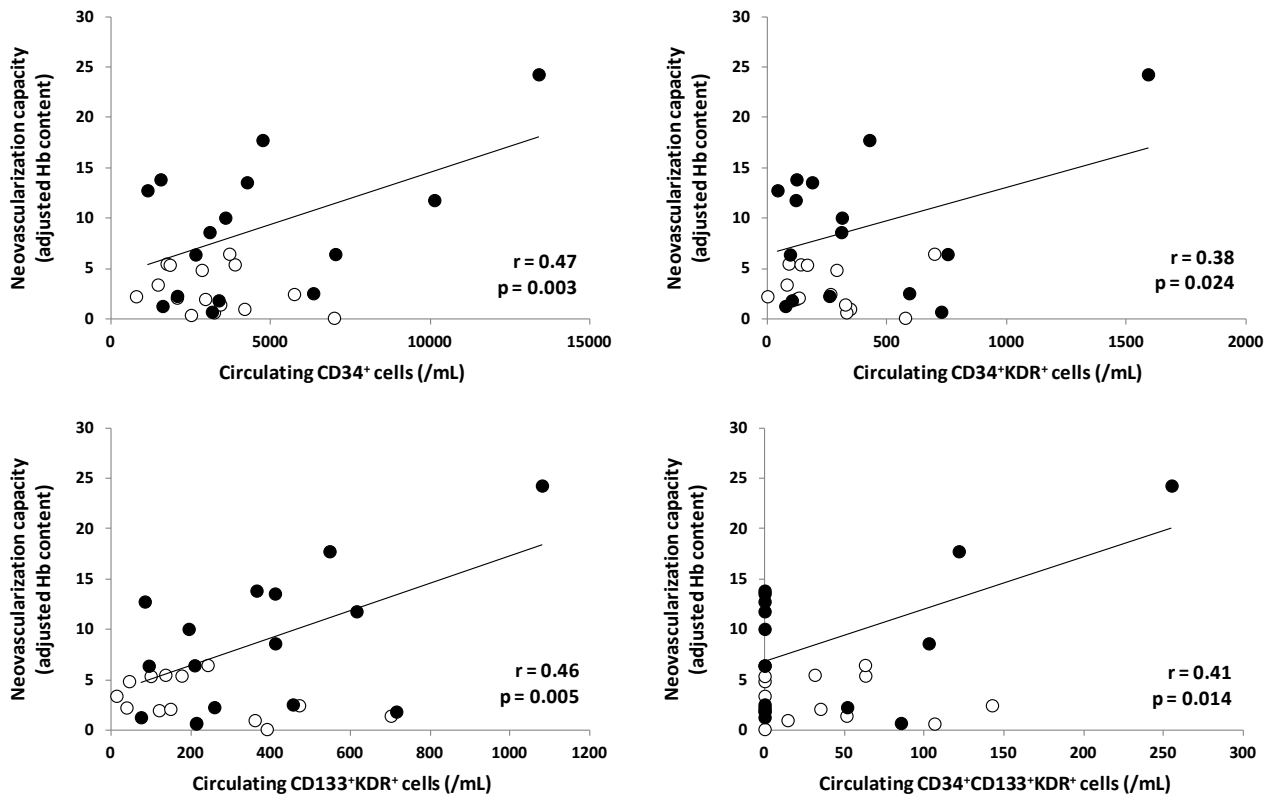

Supplement: supp_dc12-1084v121084_DC121084SupplementaryData.pdf [file supp_dc12-1084v121084_DC121084SupplementaryData.pdf]
